# Supplementary material for: Medication-Related Adverse Events and Discordancies in Cystatin C–Based vs Serum Creatinine–Based Estimated Glomerular Filtration Rate in Patients With Cancer
Source: PubMed Central journal article supplement (PMC10323710; doi:10.1001/jamanetworkopen.2023.21715), 2023-07-05
Supplement: jamanetwopen-e2321715-s001.pdf [file jamanetwopen-e2321715-s001.pdf]

## Supplemental Online Content

Hanna PE, Wang Q, Strohbehn IA, et al. Medication-related adverse events and discordancies in cystatin C–based vs serum creatinine–based estimated glomerular filtration rate in patients with cancer. *JAMA Netw Open*. 2023;6(7):e2321715. doi:10.1001/jamanetworkopen.2023.21715

**eFigure 1.** Patient Flow

**eFigure 2.** Scatter Plot of eGFR<sub>CRE</sub> and eGFR<sub>CYS</sub>, and Distribution of eGFR Difference

**eFigure 3.** Changes in Potassium Levels Among Patients Who Received Trimethoprim-Sulfamethoxazole

**eTable 1.** Cancer Types

**eTable 2.** ICD 9/10 Codes for Cancer Diagnoses

**eTable 3.** Predictors of eGFR<sub>CYS</sub> < eGFR<sub>CRE</sub>

**eFigure 4.** eGFR<sub>CYS</sub> >30% Higher Than eGFR<sub>CRE</sub>

**eTable 4.** Predictors of eGFR<sub>CYS</sub> > eGFR<sub>CRE</sub>

**eTable 5.** Predictors of Vancomycin Level > 30 g/dL

**eTable 6.** Deidentified Case Summaries of Clinical Digoxin Toxicity

**eTable 7.** Predictors of 30-Day Mortality

This supplemental material has been provided by the authors to give readers additional information about their work.

**eFigure 1. Patient flow**

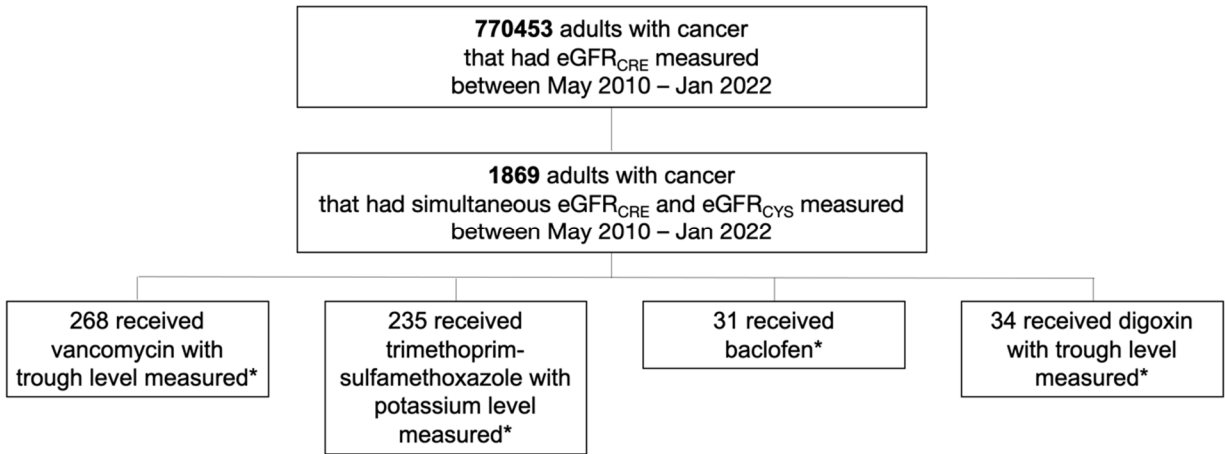

**eFigure 1.** Patient flow. Exposure to each medication was determined by an active prescription within 90 days of the baseline date. \*Shows the analyzed sample for each medication. Abbreviations: eGFR<sub>CRE</sub> = creatinine-based estimated glomerular filtration rate, eGFR<sub>CYS</sub> = cystatin c-based estimated glomerular filtration rate.

**eFigure 2. Scatter Plot of eGFR<sub>CRE</sub> and eGFR<sub>CYS</sub>, and Distribution of eGFR Difference**

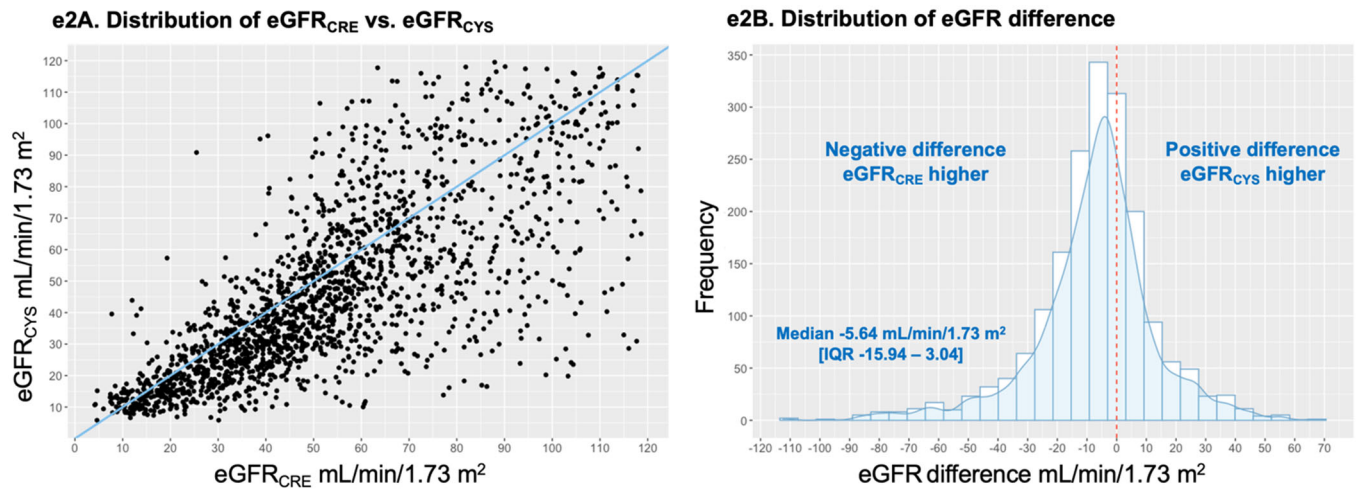

**eFigure 2.** Scatterplot showing distribution of eGFR<sub>CRE</sub> and eGFR<sub>CYS</sub> among patients with cancer (e2A); the blue line is the line of equality. Figure e1B. A histogram and superimposed density curve showing the distribution of eGFR difference defined by eGFR<sub>CYS</sub> minus eGFR<sub>CRE</sub> (negative values mean that eGFR<sub>CYS</sub> is lower than eGFR<sub>CRE</sub>). The red dotted line signifies equivalence between eGFR<sub>CRE</sub> and eGFR<sub>CYS</sub>. Abbreviations: IQR, interquartile range

**eFigure 3.** Changes in Potassium Levels Among Patients Who Received Trimethoprim-Sulfamethoxazole

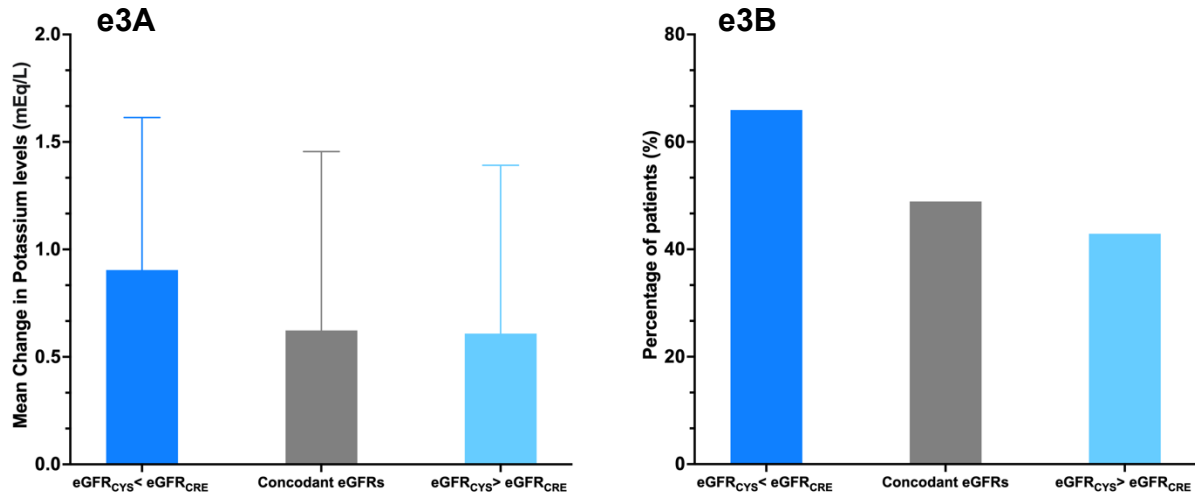

**eFigure 3A.** Mean change in potassium levels with standard deviations among trimethoprim-sulfamethoxazole recipients; error bars show standard deviation. **eFigure 3B.** Percentage of patients with  $\geq 0.5$  mEq/L rise in potassium levels after beginning trimethoprim-sulfamethoxazole.

**eTable 1. Cancer type**

|                   | N   | eGFR <sub>CYS</sub> <<br>eGFR <sub>CRE</sub> | eGFR <sub>CYS</sub> ≈<br>eGFR <sub>CRE</sub> | eGFR <sub>CYS</sub> ><br>eGFR <sub>CRE</sub> | Age (mean<br>(SD)) | Male (%)  | Female (%) | Cirrhosis<br>(%) | Baseline<br>Albumin<br>(median<br>[IQR]) | Baseline<br>Hemoglobin<br>(median [IQR]) |
|-------------------|-----|----------------------------------------------|----------------------------------------------|----------------------------------------------|--------------------|-----------|------------|------------------|------------------------------------------|------------------------------------------|
| Adrenal           | 4   | 2 (50)                                       | 1 (25)                                       | 1 (25)                                       | 62 (17)            | 4 (100)   | 0 (0)      | 1 (25)           | 4.1 [3.4, 4.6]                           | 12.6 [11.5, 13.1]                        |
| Bladder           | 89  | 22 (25)                                      | 62 (70)                                      | 5 (6)                                        | 72(10)             | 72 (81)   | 17 (19)    | 1 (1)            | 4.1 [3.4, 4.4]                           | 12.1 [9.8, 13.70]                        |
| Brain             | 41  | 9 (22)                                       | 28 (68)                                      | 4 (10)                                       | 59 (13)            | 18 (44)   | 23 (56)    | 1 (2)            | 4.3 [3.9, 4.5]                           | 12.3 [10.7, 14.1]                        |
| Breast            | 227 | 37 (16)                                      | 153 (68)                                     | 37 (16)                                      | 63 (15)            | 4 (2)     | 223 (98)   | 8 (4)            | 4.1 [3.9, 4.4]                           | 11.6 [10.0, 12.7]                        |
| Gastrointestinal  | 202 | 73 (36)                                      | 112 (55)                                     | 17 (8)                                       | 69 (13)            | 123 (61)  | 79 (39)    | 24 (12)          | 4.0 [3.1, 4.4]                           | 11.0 [9.0, 12.8]                         |
| Gynecological     | 146 | 37 (25)                                      | 95 (65)                                      | 14 (10)                                      | 64 (12)            | 5 (3)     | 141 (97)   | 5 (3)            | 4.0 [3.5, 4.4]                           | 11.2 [9.4, 12.7]                         |
| Head and Neck     | 44  | 15 (34)                                      | 25 (57)                                      | 4 (9)                                        | 66 (15)            | 35 (80)   | 9 (20)     | 0 (0.0)          | 4.1 [3.2, 4.6]                           | 11.8 [9.6, 13.3]                         |
| Leukemia          | 131 | 66 (50)                                      | 58 (44)                                      | 7 (5)                                        | 63 (14)            | 86 (66)   | 45 (34)    | 13 (10)          | 3.6 [2.7, 4.3]                           | 9.4 [8.2, 12.2]                          |
| Lymphoma          | 69  | 27 (39)                                      | 35 (51)                                      | 7 (10)                                       | 62 (15)            | 40 (58)   | 29 (42)    | 6 (9)            | 4.0 [2.9, 4.5]                           | 11.6 [8.6, 13.5]                         |
| Melanoma          | 13  | 6 (46)                                       | 6 (46)                                       | 1 (8)                                        | 69 (21)            | 10 (77)   | 3 (23)     | 0 (0.0)          | 4.2 [3.7, 4.5]                           | 12.4 [10.8, 13.9]                        |
| Myeloma           | 62  | 25 (40)                                      | 31 (50)                                      | 6 (10)                                       | 67 (10)            | 26 (42)   | 36 (58)    | 1 (2)            | 4.1 [3.2, 4.3]                           | 11.4 [8.9, 13.1]                         |
| Other cancer      | 74  | 25 (34)                                      | 38 (51)                                      | 11 (15)                                      | 62 (15)            | 34 (46)   | 40 (54)    | 6 (8)            | 4.1 [3.0, 4.4]                           | 11.7 [8.8, 13.1]                         |
| Other Skin cancer | 343 | 84 (25)                                      | 221 (64)                                     | 38 (11)                                      | 68 (15)            | 205 (60)  | 138 (40)   | 21 (6)           | 4.1 [3.6, 4.5]                           | 12.1 [10.2, 13.9]                        |
| Prostate          | 145 | 31 (21)                                      | 103 (71)                                     | 11 (8)                                       | 74 (10)            | 145 (100) | 0 (0)      | 3 (2)            | 4.1 [3.9, 4.4]                           | 12.3 [10.7, 14.0]                        |
| Renal             | 114 | 28 (25)                                      | 74 (65)                                      | 12 (11)                                      | 60 (15)            | 76 (67)   | 38 (33)    | 2 (2)            | 4.2 [4.0, 4.6]                           | 12.8 [11.1, 14.1]                        |
| Sarcoma           | 5   | 1 (20)                                       | 4 (80)                                       | 0 (0)                                        | 60 (25)            | 3 (60)    | 2 (40)     | 0 (0)            | 4.3 [4.1, 4.3]                           | 11.7 [11.2, 14.7]                        |
| Testicular        | 1   | 0 (0)                                        | 1 (100)                                      | 0 (0)                                        | 40 (NA)            | 1 (100)   | 0 (0)      | 0 (0)            | 4.5 [4.5, 4.5]                           | 15.2 [15.2, 15.2]                        |
| Thoracic          | 112 | 44 (39)                                      | 56 (50)                                      | 12 (11)                                      | 68 (12)            | 43 (38)   | 69 (62)    | 4 (3)            | 3.9 [3.2, 4.3]                           | 11.1 [9.1, 12.4]                         |
| Thyroid           | 44  | 11 (25)                                      | 26 (59)                                      | 7 (16)                                       | 64 (13)            | 17 (39)   | 27 (61)    | 4 (9)            | 4.1 [3.5, 4.4]                           | 11.8 [10.2, 13.5]                        |
| Ureter            | 3   | 0 (0)                                        | 2 (67)                                       | 1 (33)                                       | 62 (16)            | 1 (33)    | 2 (67)     | 0 (0)            | 4.2 [3.8, 4.6]                           | 12.9 [10.9, 13.5]                        |

**eTable 1.** Cancer type was determined by the most commonly appearing cancer-related diagnosis code prior to the baseline date.

eTable 2. ICD9/10 Codes for Cancer Diagnoses

|                  |                                                                                                                                                                                                                                                                                                                                                                                                                                                                                                                                                                                                                                                                                                                                                                                                              |
|------------------|--------------------------------------------------------------------------------------------------------------------------------------------------------------------------------------------------------------------------------------------------------------------------------------------------------------------------------------------------------------------------------------------------------------------------------------------------------------------------------------------------------------------------------------------------------------------------------------------------------------------------------------------------------------------------------------------------------------------------------------------------------------------------------------------------------------|
| Adrenal          | ("194.0", "237.2", "C74.00", "C74.01", "C74.10", "C74.90", "C74.92", "D44.10", "D44.12")                                                                                                                                                                                                                                                                                                                                                                                                                                                                                                                                                                                                                                                                                                                     |
| Bladder          | ("188.0", "188.1", "188.2", "188.3", "188.4", "188.5", "188.8", "188.9", "233.7", "236.7", "239.4", "C23", "C67.0", "C67.1", "C67.2", "C67.3", "C67.4", "C67.5", "C67.8", "C67.9", "D09.0", "D37.6", "D41.4", "D49.4", "V10.51", "Z85.51")                                                                                                                                                                                                                                                                                                                                                                                                                                                                                                                                                                   |
| Breast           | ("174.0", "174.1", "174.2", "174.3", "174.4", "174.5", "174.6", "174.8", "174.9", "175.0", "175.9", "233.0", "238.3", "239.3", "C43.52", "C44.521", "C44.591", "C50.011", "C50.012", "C50.019", "C50.111", "C50.112", "C50.119", "C50.121", "C50.211", "C50.212", "C50.219", "C50.221", "C50.311", "C50.312", "C50.321", "C50.322", "C50.411", "C50.412", "C50.419", "C50.511", "C50.512", "C50.519", "C50.611", "C50.612", "C50.811", "C50.812", "C50.819", "C50.821", "C50.911", "C50.912", "C50.919", "C50.921", "C50.922", "C50.929", "D05.00", "D05.01", "D05.10", "D05.11", "D05.12", "D05.90", "D05.91", "D05.92", "V10.3", "Z85.3", "Z86.000")                                                                                                                                                       |
| Gastrointestinal | ("150.5", "150.8", "150.9", "151.4", "151.9", "152.8", "153.1", "153.2", "153.3", "153.6", "153.9", "154.1", "154.3", "154.8", "155.0", "157.0", "157.1", "157.2", "157.8", "157.9", "209.00", "209.17", "230.1", "230.3", "230.6", "235.2", "235.3", "C15.3", "C15.4", "C15.5", "C15.8", "C15.9", "C16.1", "C16.2", "C16.5", "C16.6", "C16.8", "C16.9", "C17.9", "C18.2", "C18.4", "C18.6", "C18.7", "C18.8", "C18.9", "C20", "C21.0", "C22.0", "C22.1", "C22.7", "C22.8", "C23", "C24.0", "C24.9", "C25.0", "C25.1", "C25.2", "C25.3", "C25.4", "C25.7", "C25.8", "C25.9", "C7A.019", "C7A.026", "C7A.092", "D00.1", "D37.1", "D37.4", "D37.5", "D37.6", "V10.00", "V10.03", "V10.04", "V10.06", "V10.09", "Z85.01", "Z85.020", "Z85.028", "Z85.040", "Z85.048", "Z85.05", "Z85.060", "Z85.068", "Z85.07") |
| Gynecological    | ("179.0", "180.0", "180.8", "180.9", "182", "182.8", "183.0", "183.5", "183.8", "183.9", "184.0", "184.4", "184.8", "184.9", "233.1", "233.3", "233.32", "236.0", "236.2", "236.3", "C51.9", "C52", "C53.0", "C53.1", "C53.8", "C53.9", "C54.1", "C54.8", "C54.9", "C55", "C56.1", "C56.2", "C56.3", "C56.9", "C57.4", "C57.7", "C57.8", "C57.9", "D06.0", "D06.1", "D06.9", "D07.0", "D07.30", "D39.0", "D39.10", "D39.12", "D39.8", "V10.40", "V10.41", "V10.42", "V10.43", "V10.44", "V71.1", "Z85.40", "Z85.41", "Z85.42", "Z85.43", "Z85.44", "Z86.001")                                                                                                                                                                                                                                                |
| Head and Neck    | ("140.1", "140.5", "140.9", "141.0", "141.1", "141.2", "141.3", "141.4", "141.8", "141.9", "142.9", "144.0", "144.9", "145.9", "146.9", "149.0", "149.8", "160.0", "160.9", "161.9", "172.0", "173.0", "173.01", "173.02", "191.2", "230.0", "231.0", "235.0", "235.1", "235.6", "C01", "C02.1", "C02.2", "C02.8", "C02.9", "C03.1", "C06.9", "C10.2", "C10.8", "C10.9", "C11.0", "C11.1", "C11.9", "C12", "C13.1", "C13.9", "C14.0", "C30.0", "C31.0", "C31.3", "C31.8", "C31.9", "C32.9", "C41.1", "C43.0", "C44.01", "C44.02", "C44.301", "C44.311", "C44.321", "C49.0", "C4A.31", "C71.2", "C76.0", "D00.07", "D02.0", "D04.0", "D37.030", "D37.039", "D37.04", "V10.01", "V10.02", "V10.21", "V10.22", "Z85.21", "Z85.22", "Z85.810", "Z85.818", "Z85.819")                                             |
| Leukemia         | ("203.10", "204.00", "204.01", "204.02", "204.1", "204.10", "204.11", "204.12", "204.20", "204.80", "204.9", "204.90", "205.0", "205.00", "205.01", "205.02", "205.1", "205.10", "205.11", "205.30", "205.90", "205.91", "205.92", "206.00", "207.0", "207.80", "208.0", "208.00", "208.01", "208.10", "208.8", "208.80", "208.9", "208.90", "208.91", "208.92", "C90.10", "C91.00", "C91.01", "C91.02", "C91.10", "C91.11", "C91.12", "C91.50", "C91.51", "C91.52", "C91.60", "C91.90", "C91.91", "C91.92", "C91.Z0", "C91.Z1", "C91.Z2", "C92.00", "C92.01", "C92.02", "C92.10", "C92.11", "C92.20", "C92.21", "C92.30", "C92.32", "C92.40", "C92.41", "C92.42", "C92.50", "C92.51", "C92.52", "C92.90", "C92.A0", "C92.A1", "C92.A2", "C92.Z1", "C92.Z2",                                                 |

|              |                                                                                                                                                                                                                                                                                                                                                                                                                                                                                                                                                                                                                                                                                                                                                                                                                                                                                                                                                                                                                                                                                                                                                                                                                                                                                                                                                                                                                                                                                                    |
|--------------|----------------------------------------------------------------------------------------------------------------------------------------------------------------------------------------------------------------------------------------------------------------------------------------------------------------------------------------------------------------------------------------------------------------------------------------------------------------------------------------------------------------------------------------------------------------------------------------------------------------------------------------------------------------------------------------------------------------------------------------------------------------------------------------------------------------------------------------------------------------------------------------------------------------------------------------------------------------------------------------------------------------------------------------------------------------------------------------------------------------------------------------------------------------------------------------------------------------------------------------------------------------------------------------------------------------------------------------------------------------------------------------------------------------------------------------------------------------------------------------------------|
|              | "C93.00", "C93.01", "C93.10", "C93.11", "C94.31", "C94.80", "C95.00", "C95.01", "C95.02", "C95.90", "C95.92", "V10.60", "V10.61", "V10.62", "V10.63", "Z85.6")                                                                                                                                                                                                                                                                                                                                                                                                                                                                                                                                                                                                                                                                                                                                                                                                                                                                                                                                                                                                                                                                                                                                                                                                                                                                                                                                     |
| Lymphoma     | ("202.8", "202.80", "202.81", "202.82", "202.83", "202.85", "202.86", "202.88", "202.90", "204.00", "204.01", "204.02", "204.1", "204.10", "204.11", "204.12", "204.20", "204.80", "204.9", "204.90", "C91.50", "C91.51", "C91.52", "C91.90", "C91.91", "C91.92", "C91.Z0", "C91.Z1", "C91.Z2", "C96.9", "D47.9", "D47.Z9", "V10.61", "Z85.79")                                                                                                                                                                                                                                                                                                                                                                                                                                                                                                                                                                                                                                                                                                                                                                                                                                                                                                                                                                                                                                                                                                                                                    |
| melanoma     | ("172.0", "172.2", "172.3", "172.4", "172.6", "172.7", "172.8", "190.6", "C43.0", "C43.20", "C43.22", "C43.30", "C43.39", "C43.4", "C43.52", "C43.59", "C43.60", "C43.61", "C43.62", "C43.70", "C43.71", "C43.72", "C43.8", "C43.9", "C69.31", "V10.82", "Z85.820")                                                                                                                                                                                                                                                                                                                                                                                                                                                                                                                                                                                                                                                                                                                                                                                                                                                                                                                                                                                                                                                                                                                                                                                                                                |
| meningioma   | ("191.8", "191.9", "192.1", "237.5", "237.6", "239.6", "C70.1", "C71.7", "C71.8", "C71.9", "D42.0", "D42.1", "D42.9", "D43.0", "D43.2", "D49.6", "V10.85", "Z85.841")                                                                                                                                                                                                                                                                                                                                                                                                                                                                                                                                                                                                                                                                                                                                                                                                                                                                                                                                                                                                                                                                                                                                                                                                                                                                                                                              |
| Myeloma      | ("203.0", "203.00", "203.01", "C90.00", "C90.01", "C90.02")                                                                                                                                                                                                                                                                                                                                                                                                                                                                                                                                                                                                                                                                                                                                                                                                                                                                                                                                                                                                                                                                                                                                                                                                                                                                                                                                                                                                                                        |
| Other skin   | ("172.0", "172.2", "172.3", "172.4", "172.6", "172.7", "172.8", "173.0", "173.01", "173.02", "173.1", "173.11", "173.12", "173.2", "173.20", "173.21", "173.22", "173.3", "173.30", "173.31", "173.32", "173.39", "173.4", "173.40", "173.41", "173.42", "173.49", "173.6", "173.60", "173.61", "173.62", "173.69", "173.7", "173.70", "173.71", "173.72", "173.79", "173.8", "173.81", "173.82", "173.89", "173.9", "173.90", "173.91", "173.92", "176.0", "209.31", "209.33", "209.36", "209.75", "232.2", "232.3", "232.4", "232.6", "232.7", "232.8", "232.9", "238.2", "239.2", "C43.52", "C43.8", "C43.9", "C44.01", "C44.02", "C44.109", "C44.111", "C44.112", "C44.1122", "C44.119", "C44.1192", "C44.129", "C44.1292", "C44.199", "C44.202", "C44.212", "C44.219", "C44.222", "C44.229", "C44.300", "C44.301", "C44.310", "C44.311", "C44.319", "C44.320", "C44.321", "C44.329", "C44.390", "C44.40", "C44.41", "C44.42", "C44.49", "C44.509", "C44.519", "C44.520", "C44.521", "C44.529", "C44.591", "C44.609", "C44.611", "C44.612", "C44.619", "C44.621", "C44.622", "C44.629", "C44.702", "C44.711", "C44.712", "C44.719", "C44.722", "C44.729", "C44.89", "C44.90", "C44.91", "C44.92", "C44.99", "C46.0", "C4A.30", "C4A.31", "C4A.39", "C4A.4", "C4A.59", "C4A.9", "D04.0", "D04.12", "D04.21", "D04.22", "D04.30", "D04.39", "D04.4", "D04.5", "D04.61", "D04.62", "D04.71", "D04.72", "D04.9", "D48.5", "D49.2", "V10.82", "V10.83", "Z85.820", "Z85.821", "Z85.828", "Z86.007") |
| Other Cancer | ("146.0", "171.9", "186.9", "192.2", "194.3", "233.9", "238.1", "238.7", "238.79", "238.8", "239.5", "239.7", "239.8", "239.9", "789.51", "C08.1", "C40.21", "C41.9", "C48.0", "C49.4", "C49.9", "C68.0", "C68.9", "C71.1", "C76.51", "C80.1", "D44.3", "D47.09", "D48.0", "D48.9", "D49.7", "D49.89", "G89.3", "J91.0", "R18.0", "T88.3XXA", "V10.05", "V10.79", "V10.89", "V10.90", "Z08", "Z85.038", "Z85.830", "Z85.831", "Z85.858", "Z85.89", "Z85.9", "Z86.008")                                                                                                                                                                                                                                                                                                                                                                                                                                                                                                                                                                                                                                                                                                                                                                                                                                                                                                                                                                                                                             |
| Prostate     | ("185", "185.9", "233.4", "236.5", "C61", "D07.5", "R97.21", "V10.46", "Z85.46")                                                                                                                                                                                                                                                                                                                                                                                                                                                                                                                                                                                                                                                                                                                                                                                                                                                                                                                                                                                                                                                                                                                                                                                                                                                                                                                                                                                                                   |
| Renal        | ("189.1", "236.91", "C65.1", "C65.2", "C65.9", "C7A.093", "D41.00", "D41.11", "D41.12", "D49.511", "D49.512", "D49.519", "V10.52", "V10.53", "Z85.520", "Z85.528", "Z85.53")                                                                                                                                                                                                                                                                                                                                                                                                                                                                                                                                                                                                                                                                                                                                                                                                                                                                                                                                                                                                                                                                                                                                                                                                                                                                                                                       |
| Sarcoma      | ("176.0", "176.9", "200.00", "200.01", "200.02", "200.10", "200.18", "200.80", "201.21", "205.30", "C46.0", "C46.1", "C46.3", "C46.7", "C46.9", "C92.30", "C92.32", "C96.A", "V10.71")                                                                                                                                                                                                                                                                                                                                                                                                                                                                                                                                                                                                                                                                                                                                                                                                                                                                                                                                                                                                                                                                                                                                                                                                                                                                                                             |
| Testicular   | ("186.9", "C62.90", "D40.10")                                                                                                                                                                                                                                                                                                                                                                                                                                                                                                                                                                                                                                                                                                                                                                                                                                                                                                                                                                                                                                                                                                                                                                                                                                                                                                                                                                                                                                                                      |
| Thoracic     | ("162.3", "162.4", "162.5", "162.8", "162.9", "163.8", "163.9", "231.2", "235.7", "235.8", "235.9", "239.1", "C34.10", "C34.11", "C34.12", "C34.2", "C34.30", "C34.31", "C34.32", "C34.80", "C34.81", "C34.82", "C34.90", "C34.91", "C34.92", "C38.4", "D02.20", "D38.1", "D38.5", "D49.1", "V10.11", "V10.29", "Z85.110", "Z85.118", "Z85.29")                                                                                                                                                                                                                                                                                                                                                                                                                                                                                                                                                                                                                                                                                                                                                                                                                                                                                                                                                                                                                                                                                                                                                    |
| Thyroid      | ("193", "C73", "V10.87", "Z85.850")                                                                                                                                                                                                                                                                                                                                                                                                                                                                                                                                                                                                                                                                                                                                                                                                                                                                                                                                                                                                                                                                                                                                                                                                                                                                                                                                                                                                                                                                |
| Ureter       | ("188.6", "189.2", "236.91", "C66.1", "C66.2", "C66.9", "C67.6", "D41.21", "D41.22", "Z85.54")                                                                                                                                                                                                                                                                                                                                                                                                                                                                                                                                                                                                                                                                                                                                                                                                                                                                                                                                                                                                                                                                                                                                                                                                                                                                                                                                                                                                     |

eTable 3. Predictors of eGFR<sub>CYS</sub> < eGFR<sub>CRE</sub>

| Covariates                         | eGFR <sub>CYS</sub> < eGFR <sub>CRE</sub> |            |                  |               |            |                  |
|------------------------------------|-------------------------------------------|------------|------------------|---------------|------------|------------------|
|                                    | Univariable                               |            |                  | Multivariable |            |                  |
|                                    | OR                                        | 95% CI     | p-value          | Adj OR        | 95% CI     | p-value          |
| Age (per 10 years)                 | 1.05                                      | 0.97, 1.13 | 0.22             | 0.94          | 0.85, 1.04 | 0.21             |
| Female Sex                         | 1.12                                      | 0.92, 1.38 | 0.26             | 1.07          | 0.83, 1.37 | 0.61             |
| White Race                         | 1.13                                      | 0.87, 1.47 | 0.37             | 1.43          | 1.05, 1.95 | <b>0.025</b>     |
| Body mass index, kg/m <sup>2</sup> |                                           |            |                  |               |            |                  |
| Normal (18.5 - 24.9)               | REF                                       | —          | —                | —             | —          | —                |
| Under weight (<18.5)               | 2.13                                      | 1.17, 3.88 | <b>0.013</b>     | 1.74          | 0.86, 3.54 | 0.12             |
| Overweight (25 - 29.9)             | 1.0                                       | 0.77, 1.29 | 0.97             | 1.19          | 0.87, 1.62 | 0.28             |
| Obese (≥ 30)                       | 1.01                                      | 0.75, 1.36 | 0.96             | 1.41          | 0.98, 2.01 | 0.06             |
| Smoking                            | 1.29                                      | 1.05, 1.58 | <b>0.017</b>     | 0.95          | 0.74, 1.22 | 0.68             |
| <b>Comorbidities</b>               |                                           |            |                  |               |            |                  |
| Hypertension                       | 1.80                                      | 1.35, 2.44 | <b>&lt;0.001</b> | 0.97          | 0.65, 1.46 | 0.89             |
| Coronary Artery Disease            | 2.26                                      | 1.83, 2.80 | <b>&lt;0.001</b> | 1.28          | 0.97, 1.69 | 0.08             |
| Diabetes Mellitus                  | 2.48                                      | 2.01, 3.08 | <b>&lt;0.001</b> | 1.27          | 0.96, 1.66 | 0.09             |
| Cirrhosis                          | 3.20                                      | 2.11, 4.89 | <b>&lt;0.001</b> | 1.68          | 1.03, 2.77 | <b>0.041</b>     |
| Human Immunodeficiency Virus       | 0.88                                      | 0.50, 1.49 | 0.63             |               |            |                  |
| Malnutrition                       | 1.34                                      | 1.01, 1.78 | <b>0.044</b>     | 0.99          | 0.70, 1.40 | 0.97             |
| Thyroid disease                    | 1.47                                      | 1.17, 1.84 | <b>&lt;0.001</b> | 1.21          | 0.92, 1.59 | 0.18             |
| <b>Medication Use*</b>             |                                           |            |                  |               |            |                  |
| ACEi/ARB                           | 1.06                                      | 0.86, 1.31 | 0.57             |               |            |                  |
| Proton Pump Inhibitors             | 1.84                                      | 1.46, 2.32 | <b>&lt;0.001</b> | 0.85          | 0.64, 1.14 | 0.28             |
| Diuretics                          | 2.99                                      | 2.34, 3.84 | <b>&lt;0.001</b> | 1.60          | 1.15, 2.24 | <b>0.005</b>     |
| Corticosteroids                    | 3.43                                      | 2.70, 4.37 | <b>&lt;0.001</b> | 1.65          | 1.23, 2.21 | <b>&lt;0.001</b> |
| <b>Labs</b>                        |                                           |            |                  |               |            |                  |
| eGFR <sub>CRE-CYS</sub>            | 0.98                                      | 0.98, 0.98 | <b>&lt;0.001</b> | 0.99          | 0.98, 1.0  | <b>&lt;0.001</b> |
| Albumin (g/dL)                     |                                           |            |                  |               |            |                  |
| ≥4.0                               | REF                                       | —          | —                | —             | —          | —                |
| 3.0 to <4.0                        | 4.45                                      | 3.45, 5.75 | <b>&lt;0.001</b> | 2.53          | 1.87, 3.42 | <b>&lt;0.001</b> |
| <3.0                               | 11.6                                      | 8.55, 15.9 | <b>&lt;0.001</b> | 6.09          | 4.16, 8.98 | <b>&lt;0.001</b> |
| Hemoglobin (g/dL)                  |                                           |            |                  |               |            |                  |
| ≥12.0                              | REF                                       | —          | —                | —             | —          | —                |
| 10.0 to <12.0                      | 2.67                                      | 2.01, 3.56 | <b>&lt;0.001</b> | 1.64          | 1.19, 2.26 | <b>0.002</b>     |
| <10.0                              | 7.50                                      | 5.75, 9.83 | <b>&lt;0.001</b> | 1.98          | 1.38, 2.83 | <b>&lt;0.001</b> |

Univariable and multivariable logistic regression model. \*Chronic medication use was defined within 1 year prior to baseline; corticosteroid use was defined within 30 days of baseline. In all cases the population median was imputed for missing variables (Body mass index was missing for 479 participants, serum albumin was missing for 72 participants, hemoglobin was missing for 46 participants). Abbreviations eGFR<sub>CRE-CYS</sub> = estimated Glomerular Filtration Rate calculated using the 2021 race-free combined serum creatinine and cystatin C equation, ACEi/ARB = Angiotensin Converting Enzyme Inhibitor/Angiotensin Receptor Blocker.



**eFigure 4. eGFR<sub>CYS</sub> >30% Higher Than eGFR<sub>CRE</sub>**

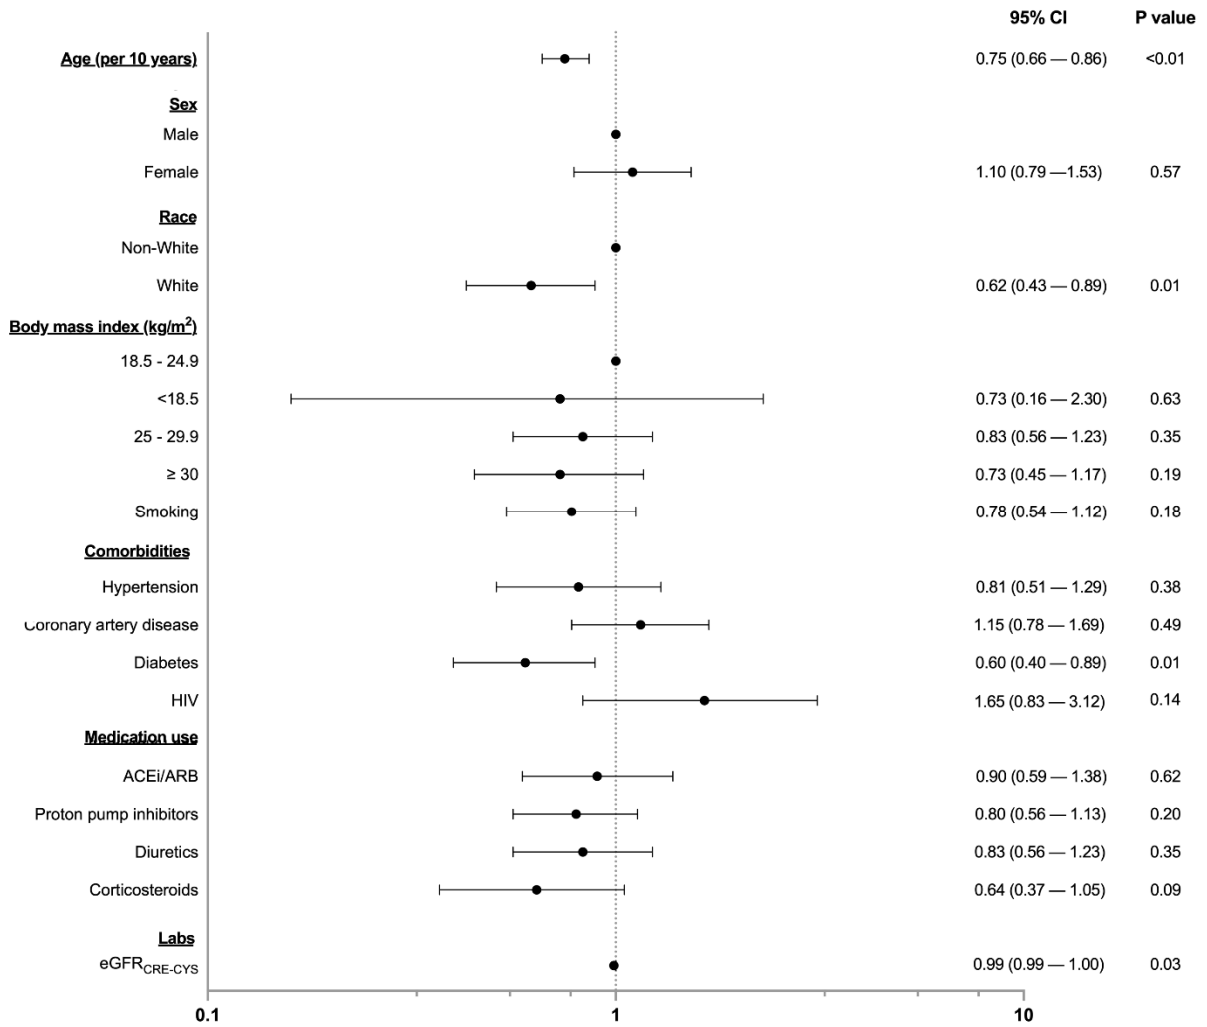

**eTable 4. Predictors of eGFR<sub>CYS</sub> > eGFR<sub>CRE</sub>**

| Covariates                         | eGFR <sub>CYS</sub> > eGFR <sub>CRE</sub> |            |              |               |            |              |
|------------------------------------|-------------------------------------------|------------|--------------|---------------|------------|--------------|
|                                    | Univariable                               |            |              | Multivariable |            |              |
|                                    | OR                                        | 95% CI     | p-value      | Adj OR        | 95% CI     | p-value      |
| Age (per 10 years)                 | 0.73                                      | 0.65, 0.81 | <0.001       | 0.75          | 0.66, 0.86 | <0.001       |
| Female Sex                         | 1.14                                      | 0.84, 1.54 | 0.41         | 1.10          | 0.79, 1.53 | 0.57         |
| White Race                         | 0.61                                      | 0.43, 0.86 | <b>0.004</b> | 0.62          | 0.43, 0.89 | <b>0.010</b> |
| Body mass index, kg/m <sup>2</sup> |                                           |            |              |               |            |              |
| Normal (18.5 - 24.9)               | REF                                       | —          | —            | —             | —          | —            |
| Under weight (<18.5)               | 0.60                                      | 0.14, 1.80 | 0.42         | 0.73          | 0.16, 2.30 | 0.63         |
| Overweight (25 - 29.9)             | 0.92                                      | 0.64, 1.34 | 0.66         | 0.83          | 0.56, 1.23 | 0.35         |
| Obese (≥ 30)                       | 0.66                                      | 0.42, 1.04 | 0.07         | 0.73          | 0.45, 1.17 | 0.19         |
| Smoking                            | 0.59                                      | 0.42, 0.82 | <b>0.002</b> | 0.78          | 0.54, 1.12 | 0.18         |
| Comorbidities                      |                                           |            |              |               |            |              |
| Hypertension                       | 0.49                                      | 0.35, 0.68 | <0.001       | 0.81          | 0.51, 1.29 | 0.38         |
| Coronary Artery Disease            | 0.64                                      | 0.47, 0.88 | <b>0.006</b> | 1.15          | 0.78, 1.69 | 0.49         |
| Diabetes Mellitus                  | 0.48                                      | 0.34, 0.67 | <0.001       | 0.60          | 0.40, 0.89 | <b>0.011</b> |
| Cirrhosis                          | 0.43                                      | 0.10, 1.19 | 0.16         |               |            |              |
| Human Immunodeficiency Virus       | 1.87                                      | 0.97, 3.38 | <b>0.049</b> | 1.65          | 0.83, 3.12 | 0.14         |
| Malnutrition                       | 0.77                                      | 0.46, 1.24 | 0.30         |               |            |              |
| Thyroid disease                    | 1.12                                      | 0.78, 1.58 | 0.52         |               |            |              |
| Medication Use*                    |                                           |            |              |               |            |              |
| ACEi/ARB                           | 0.55                                      | 0.40, 0.74 | <0.001       | 0.90          | 0.59, 1.38 | 0.62         |
| Proton Pump Inhibitors             | 0.58                                      | 0.43, 0.79 | <0.001       | 0.80          | 0.56, 1.13 | 0.20         |
| Diuretics                          | 0.53                                      | 0.39, 0.71 | <0.001       | 0.83          | 0.56, 1.23 | 0.35         |
| Corticosteroids                    | 0.65                                      | 0.38, 1.05 | 0.09         | 0.64          | 0.37, 1.05 | 0.09         |
| Labs                               |                                           |            |              |               |            |              |
| eGFR <sub>CRE-CYS</sub>            | 1.01                                      | 1.00, 1.01 | <0.001       | 0.99          | 0.99, 1.00 | <b>0.032</b> |
| Albumin (g/dL)                     |                                           |            |              |               |            |              |
| ≥4.0                               | REF                                       | —          | —            | —             | —          | —            |
| 3.0 to <4.0                        | 0.68                                      | 0.43, 1.04 | 0.09         |               |            |              |
| <3.0                               | 1.10                                      | 0.60, 1.88 | 0.75         |               |            |              |
| Hemoglobin (g/dL)                  |                                           |            |              |               |            |              |
| ≥12.0                              | REF                                       | —          | —            | —             | —          | —            |
| 10.0 to <12.0                      | 1.30                                      | 0.92, 1.85 | 0.14         |               |            |              |
| <10.0                              | 1.14                                      | 0.75, 1.70 | 0.53         |               |            |              |

**eTable 4.** Univariable and multivariable logistic regression model. \*Chronic medication use was defined within 1 year prior to baseline; corticosteroid use was defined within 30 days of baseline. In all cases the population median was imputed for missing variables (Body mass index was missing for 479 participants, serum albumin was missing for 72 participants, hemoglobin was missing for 46 participants). Abbreviations eGFR<sub>CRE-CYS</sub> = estimated Glomerular Filtration Rate calculated using the 2021 race-free combined serum creatinine and cystatin C equation, ACEi/ARB = Angiotensin Converting Enzyme Inhibitor/Angiotensin Receptor Blocker.

**eTable 5. Predictors of Vancomycin Level >30µg/dL**

| Covariates                                                | Predictors of Vancomycin level >30µg/dL(N=51)<br>Vs. <30µg/dL (N=217) |            |                  |               |            |              |
|-----------------------------------------------------------|-----------------------------------------------------------------------|------------|------------------|---------------|------------|--------------|
|                                                           | Univariable                                                           |            |                  | Multivariable |            |              |
|                                                           | OR                                                                    | 95% CI     | p-value          | Adj OR        | 95% CI     | p-value      |
| <b>Age (per 10 years)</b>                                 | 0.8                                                                   | 0.64, 0.98 | <b>0.033</b>     | 0.75          | 0.57, 0.98 | <b>0.036</b> |
| <b>Female Sex</b>                                         | 1.37                                                                  | 0.74, 2.53 | 0.32             | 1.49          | 0.76, 2.95 | 0.25         |
| <b>White Race</b>                                         | 1.75                                                                  | 0.74, 4.81 | 0.23             | 1.66          | 0.66, 4.83 | 0.31         |
| <b>eGFR<sub>CRE</sub> vs. eGFR<sub>CYS</sub></b>          |                                                                       |            |                  |               |            |              |
| <b>eGFR<sub>CYS</sub> ~ eGFR<sub>CRE</sub>(within 30)</b> | —                                                                     | —          |                  | —             | —          |              |
| <b>eGFR<sub>CYS</sub>&lt;eGFR<sub>CRE</sub>(&lt;-30)</b>  | 3.16                                                                  | 1.43, 8.01 | <b>0.008</b>     | 2.59          | 1.08, 7.03 | <b>0.044</b> |
| <b>eGFR<sub>CYS</sub>&gt;eGFR<sub>CRE</sub>(&gt;30)</b>   | 0.91                                                                  | 0.05, 5.86 | 0.93             | 0.98          | 0.05, 7.08 | 0.98         |
| <b>Body mass index</b>                                    | 1.04                                                                  | 0.99, 1.10 | 0.08             | 1.03          | 0.98, 1.09 | 0.21         |
| <b>Smoking</b>                                            | 0.87                                                                  | 0.47, 1.60 | 0.65             |               |            |              |
| <b>Comorbidities</b>                                      |                                                                       |            |                  |               |            |              |
| <b>Hypertension</b>                                       | 1.35                                                                  | 0.57, 3.74 | 0.53             |               |            |              |
| <b>Coronary Artery Disease</b>                            | 1.21                                                                  | 0.62, 2.44 | 0.59             |               |            |              |
| <b>Diabetes Mellitus</b>                                  | 3.20                                                                  | 1.32, 9.58 | <b>0.019</b>     | 2.23          | 0.83, 7.14 | 0.14         |
| <b>Cirrhosis</b>                                          | 1.07                                                                  | 0.41, 2.50 | 0.88             |               |            |              |
| <b>Malnutrition</b>                                       | 0.42                                                                  | 0.10, 1.26 | 0.17             |               |            |              |
| <b>Thyroid disease</b>                                    | 0.85                                                                  | 0.42, 1.64 | 0.63             |               |            |              |
| <b>Medication Use*</b>                                    |                                                                       |            |                  |               |            |              |
| <b>ACEi/ARB</b>                                           | 0.87                                                                  | 0.47, 1.60 | 0.65             |               |            |              |
| <b>Proton Pump Inhibitors</b>                             | 1.25                                                                  | 0.52, 3.48 | 0.64             |               |            |              |
| <b>Diuretics</b>                                          | 2.08                                                                  | 0.84, 6.28 | 0.15             |               |            |              |
| <b>Corticosteroids</b>                                    | 3.48                                                                  | 1.80, 7.14 | <b>&lt;0.001</b> | 2.81          | 1.38, 6.00 | <b>0.005</b> |
| <b>Baseline Labs</b>                                      |                                                                       |            |                  |               |            |              |
| <b>Serum Creatinine (mg/dL)</b>                           | 0.86                                                                  | 0.63, 1.09 | 0.28             |               |            |              |
| <b>eGFR<sub>CRE-CYS</sub></b>                             | 0.99                                                                  | 0.98, 1.00 | 0.06             | 0.99          | 0.97, 1.00 | 0.06         |
| <b>Baseline Albumin (g/dL)</b>                            | 0.84                                                                  | 0.51, 1.35 | 0.47             |               |            |              |
| <b>Baseline Hemoglobin (g/dL)</b>                         | 0.8                                                                   | 0.64, 0.97 | <b>0.032</b>     | 0.91          | 0.71, 1.14 | 0.43         |

**eTable 5.** Univariable and multivariable logistic regression model predicting Vancomycin trough level > 30 µg/dL. Abbreviations: eGFR<sub>CRE-CYS</sub> = estimated Glomerular Filtration Rate calculated using the 2021 race-free combined serum creatinine and cystatin C equation, ACEi/ARB = Angiotensin Converting Enzyme Inhibitor/Angiotensin Receptor Blocker.

**eTable 6. Deidentified Case Summaries of Clinical Digoxin Toxicity**

|                                                                                        |                                                                                                                                                                                                                                                                                                                                                                                                                                                  |
|----------------------------------------------------------------------------------------|--------------------------------------------------------------------------------------------------------------------------------------------------------------------------------------------------------------------------------------------------------------------------------------------------------------------------------------------------------------------------------------------------------------------------------------------------|
| 65-70-year-old woman with atrial fibrillation and congestive heart failure             | Admitted for hypercalcemia due to refractory multiple myeloma. She developed bradycardia with AV block, altered mental status, and hyperkalemia while on digoxin 0.25 mg daily, and her digoxin trough level was 3.8 ng/mL. She was treated with digoxin immune fab followed by improvement in bradycardia and mental status. Digoxin was permanently discontinued.                                                                              |
| 60-65-year-old woman with metastatic neuroendocrine cancer and carcinoid heart disease | Admitted for pulmonic and tricuspid valve replacement surgery and developed recurrent atrial flutter during a prolonged hospital stay. She was treated with digoxin load (0.25mg intravenous for 3 doses) followed by maintenance digoxin 0.125mg oral daily. On hospital day 83, she developed nausea and vomiting attributed to elevated digoxin (trough level was 2.1 ng/mL) and her symptoms fully resolved with discontinuation of digoxin. |

eTable 7. Predictors of 30-day Mortality

| Covariates                                            | 30-day mortality |            |                  |               |            |                 |
|-------------------------------------------------------|------------------|------------|------------------|---------------|------------|-----------------|
|                                                       | Univariable      |            |                  | Multivariable |            |                 |
|                                                       | HR               | 95% CI     | p-value          | Adj HR        | 95% CI     | p-value         |
| <b>Age (per 10 years)</b>                             | 1.01             | 0.89, 1.15 | 0.85             | 1.02          | 0.88, 1.18 | 0.77            |
| <b>Female Sex</b>                                     | 0.72             | 0.50, 1.02 | 0.06             | 0.75          | 0.52, 1.09 | 0.13            |
| <b>White Race</b>                                     | 1.61             | 0.98, 2.65 | 0.06             | 1.55          | 0.92, 2.60 | 0.10            |
| <b>Body mass index</b>                                |                  |            |                  |               |            |                 |
| Normal Range                                          | —                | —          |                  | —             | —          |                 |
| Underweight                                           | 1.24             | 0.48, 3.19 | 0.65             | 1.25          | 0.47, 3.34 | 0.65            |
| Overweight                                            | 1.03             | 0.68, 1.56 | 0.90             | 1.05          | 0.68, 1.62 | 0.83            |
| Obese                                                 | 0.59             | 0.34, 1.02 | 0.06             | 1.07          | 0.61, 1.89 | 0.81            |
| <b>eGFR<sub>CRE</sub> vs. eGFR<sub>CYS</sub></b>      |                  |            |                  |               |            |                 |
| eGFR <sub>CYS</sub> ~ eGFR <sub>CRE</sub> (within 30) | —                | —          |                  | —             | —          |                 |
| eGFR <sub>CYS</sub> <eGFR <sub>CRE</sub> (<-30)       | 7.67             | 5.03, 11.7 | <b>&lt;0.001</b> | 1.98          | 1.26, 3.11 | <b>0.003</b>    |
| eGFR <sub>CYS</sub> >eGFR <sub>CRE</sub> (>30)        | 1.07             | 0.41, 2.77 | 0.89             | 0.91          | 0.35, 2.42 | 0.86            |
| <b>Smoking</b>                                        | 1.18             | 0.84, 1.68 | 0.34             |               |            |                 |
| <b>Comorbidities</b>                                  |                  |            |                  |               |            |                 |
| Hypertension                                          | 0.83             | 0.55, 1.26 | 0.38             |               |            |                 |
| Coronary Artery Disease                               | 2.01             | 1.39, 2.90 | <b>&lt;0.001</b> | 1.01          | 0.67, 1.53 | 0.96            |
| Diabetes Mellitus                                     | 2.42             | 1.65, 3.55 | <b>&lt;0.001</b> | 1.04          | 0.67, 1.60 | 0.88            |
| Cirrhosis                                             | 2.77             | 1.66, 4.61 | <b>&lt;0.001</b> | 1.24          | 0.72, 2.15 | 0.44            |
| Human Immunodeficiency Virus                          | 0.92             | 0.38, 2.26 | 0.86             |               |            |                 |
| Malnutrition                                          | 0.58             | 0.31, 1.08 | 0.09             | 0.52          | 0.27, 1.00 | 0.05            |
| Thyroid disease                                       | 1.23             | 0.84, 1.79 | 0.28             |               |            |                 |
| <b>Medication Use*</b>                                |                  |            |                  |               |            |                 |
| ACEi/ARB                                              | 0.7              | 0.49, 0.99 | <b>0.044</b>     | 0.88          | 0.58, 1.31 | 0.52            |
| Proton Pump Inhibitors                                | 2.07             | 1.34, 3.18 | <b>&lt;0.001</b> | 1.22          | 0.75, 1.98 | 0.42            |
| Diuretics                                             | 1.91             | 1.26, 2.91 | <b>0.002</b>     | 0.72          | 0.43, 1.20 | 0.21            |
| Corticosteroids                                       | 4.76             | 3.36, 6.73 | <b>&lt;0.001</b> | 1.49          | 1.01, 2.18 | <b>0.042</b>    |
| <b>Baseline Labs</b>                                  |                  |            |                  |               |            |                 |
| eGFR <sub>CRE-CYS</sub>                               | 0.98             | 0.97, 0.99 | <b>&lt;0.001</b> | 0.99          | 0.98, 1.00 | <b>0.027</b>    |
| Albumin (g/dL)                                        |                  |            |                  |               |            |                 |
| ≥4.0                                                  | —                | —          |                  | —             | —          |                 |
| 3.0 to <4.0                                           | 15.4             | 5.93, 39.8 | <b>&lt;0.001</b> | 6.71          | 2.43, 18.5 | <b>&lt;0.01</b> |
| <3.0                                                  | 94.3             | 38.4, 232  | <b>&lt;0.001</b> | 29.7          | 10.9, 81.0 | <b>&lt;0.01</b> |
| Hemoglobin (g/dL)                                     |                  |            |                  |               |            |                 |
| ≥12.0                                                 | —                | —          |                  | —             | —          |                 |
| 10.0 to <12.0                                         | 5.79             | 2.32, 14.4 | <b>&lt;0.001</b> | 1.92          | 0.74, 5.01 | 0.18            |
| <10.0                                                 | 28.7             | 12.6, 65.3 | <b>&lt;0.001</b> | 2.96          | 1.19, 7.36 | <b>0.020</b>    |

\*Chronic medication use was defined within 1 year prior to baseline; corticosteroid use was defined within 30 days of baseline. In all cases the population median was imputed for missing variables (body mass index was missing for 479 participants, serum albumin was missing for 72 participants, hemoglobin was missing for 46 participants).

Abbreviations:  $eGFR_{CRE-CYS}$  = estimated Glomerular Filtration Rate calculated using the 2021 race-free combined serum creatinine and cystatin C equation, ACEi/ARB = Angiotensin Converting Enzyme Inhibitor/Angiotensin Receptor Blocker.
