# Supplementary material for: Medication-Related Adverse Events and Discordancies in Cystatin C–Based vs Serum Creatinine–Based Estimated Glomerular Filtration Rate in Patients With Cancer
Source: PubMed Central journal article supplement (PMC10323710; doi:10.1001/jamanetworkopen.2023.21715), 2023-07-05
Supplement: jamanetwopen-e2321715-s002.pdf [file jamanetwopen-e2321715-s002.pdf]

## Data Sharing Statement

Hanna. Medication-Related Adverse Events and Discordancies in Cystatin C–Based vs Serum Creatinine–Based Estimated Glomerular Filtration Rate in Patients With Cancer. *JAMA Netw Open*. Published July 05, 2023. doi:10.1001/jamanetworkopen.2023.21715

### Data

**Data available:** Yes

**Data types:** Deidentified participant data

**How to access data:** Deidentified participant data, data dictionary, will be made available on reasonable written request by email to the corresponding author ([msise@partners.org](mailto:msise@partners.org)) after execution of data use agreement.

**When available:** With publication

### Supporting Documents

**Document types:** None

### Additional Information

**Who can access the data:** Deidentified participant data, data dictionary, will be made available on reasonable written request by anyone requesting the data by email to the corresponding author ([msise@partners.org](mailto:msise@partners.org)) after execution of data use agreement.

**Types of analyses:** for any purpose

**Mechanisms of data availability:** with a signed data access agreement

**Any additional restrictions:** none
